# Supplementary material
Source: publisher figshare collection journal article supplement (https://gsajournals.figshare.com/ndownloader/files/23994317)
Supplement: Supplementary file 1 [file 23994317]

## Sheet: Sheet1
Individual	L* BV	a* BV	b* BV	DFA
S.Franquette	47.35 ± 1.99	7.26 ± 0.74	30.49 ± 1.07	2.10 ± 0.47
06-032-24	46.06 ± 2.37	7.92 ± 0.68	29.70 ± 1.29	1.49 ± 0.36
Chandler	45.85 ± 2.47	7.78 ± 0.75	30.13 ± 1.27	1.77 ± 0.43
10-024-22	45.60 ± 1.84	8.18 ± 0.69	29.28 ± 0.98	1.23 ± 0.23
10-024-41	45.55 ± 1.84	7.90 ± 0.68	29.90 ± 0.98	1.47 ± 0.23
06-032-27	45.53 ± 2.55	8.11 ± 0.70	29.29 ± 1.38	2.01 ± 0.41
11-030-56	45.21 ± 1.83	8.42 ± 0.66	28.78 ± 0.97	1.39 ± 0.23
09-025-69	45.17 ± 1.95	8.77 ± 0.88	28.38 ± 1.03	1.79 ± 0.27
10-020-3	44.93 ± 1.83	8.22 ± 0.64	29.23 ± 0.97	1.43 ± 0.23
09-025-42	44.90 ± 1.95	8.23 ± 0.68	29.23 ± 1.03	1.73 ± 0.27
10-024-19	44.89 ± 1.84	8.29 ± 0.68	29.10 ± 0.98	1.44 ± 0.23
11-027-9	44.87 ± 1.86	7.32 ± 0.94	30.40 ± 0.99	1.93 ± 0.23
10-003-11	44.85 ± 1.84	9.01 ± 0.68	28.04 ± 0.98	1.74 ± 0.27
10-024-7	44.81 ± 1.95	8.71 ± 0.94	28.49 ± 1.05	1.74 ± 0.31
10-020-46	44.73 ± 1.83	8.75 ± 0.68	28.41 ± 0.97	1.71 ± 0.23
87-041-2	44.70 ± 2.12	7.94 ± 0.89	29.59 ± 1.13	2.10 ± 0.45
Waterloo	44.67 ± 2.38	7.75 ± 0.68	30.18 ± 1.27	2.10 ± 0.47
Hartley	44.50 ± 1.99	7.69 ± 0.68	30.37 ± 1.07	2.04 ± 0.47
11-027-1	44.24 ± 1.86	8.64 ± 0.68	28.58 ± 0.99	1.96 ± 0.23
09-025-99	44.22 ± 1.95	8.68 ± 0.68	28.51 ± 1.03	1.76 ± 0.27
